# Supplementary material for: Hyperactive Neuroendocrine Secretion Causes Size, Feeding, and Metabolic Defects of C. elegans Bardet-Biedl Syndrome Mutants
Source: PubMed Central journal article supplement (PMC3236739; doi:10.1371/journal.pbio.1001219), 2011-12-13
Supplement: pbio.1001219.s002.pdf [file pbio.1001219.s002.pdf]

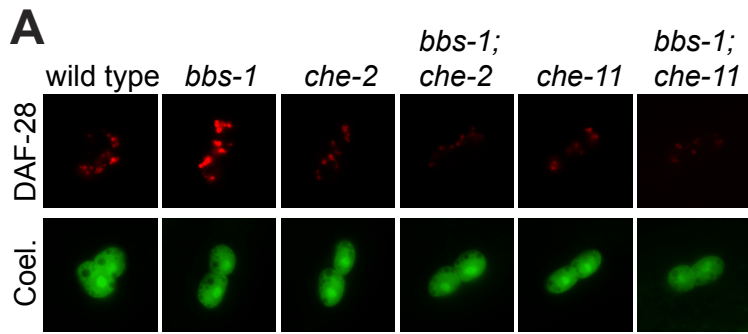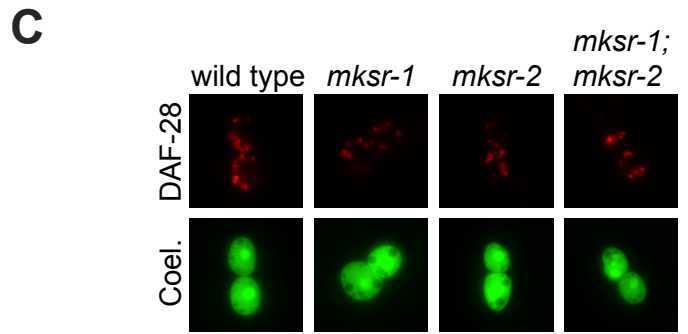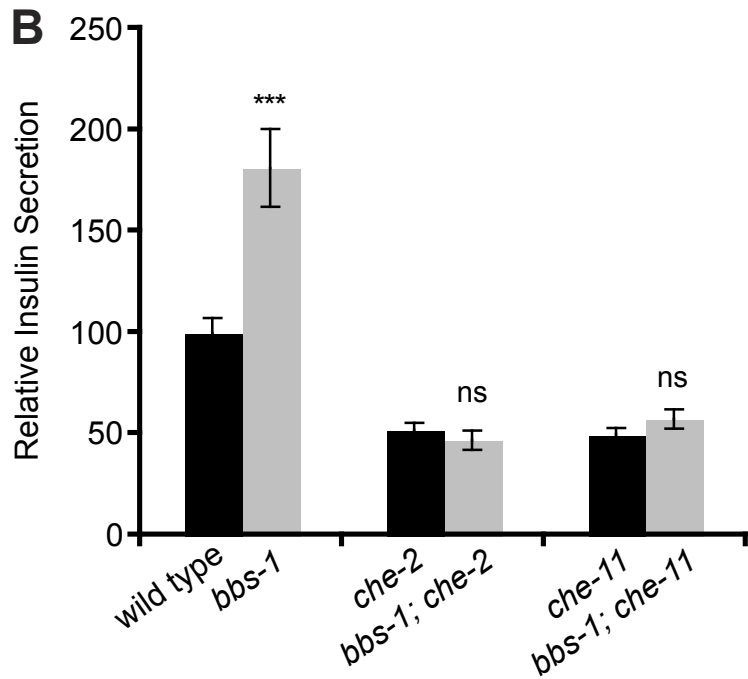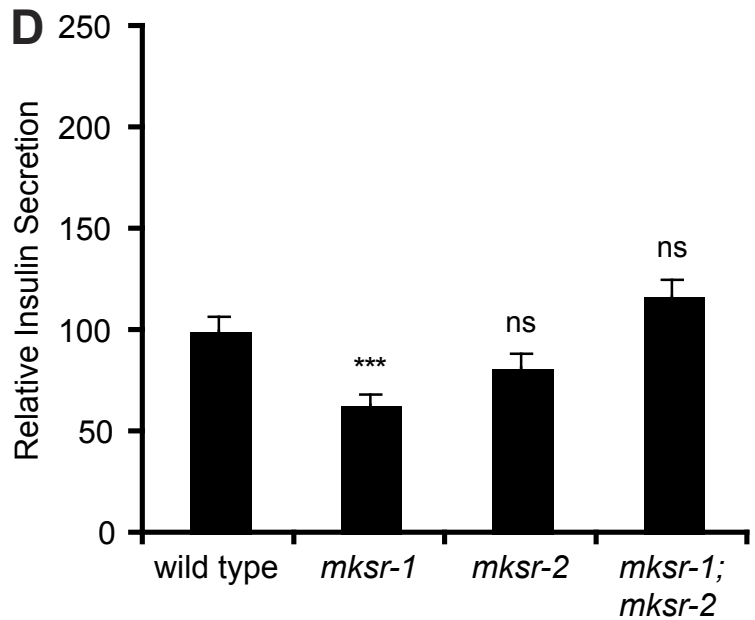

**Supplemental Figure 2. Increased Secretion of BBSome Mutant Depends on IFT. Transition Zone Mutants Do Not Increase Secretion.**

Representative images (A, C) and quantitations with standard error (B, D) of insulin accumulation in (coel.) coelomocytes in IFT (A, B) and transition zone (C, D) mutants. (\*\*\*) = p-value < 0.001, ns = not significant comparing single mutant to double mutant in B and to wild type in D).
