# Supplementary material for: Hyperactive Neuroendocrine Secretion Causes Size, Feeding, and Metabolic Defects of C. elegans Bardet-Biedl Syndrome Mutants
Source: PubMed Central journal article supplement (PMC3236739; doi:10.1371/journal.pbio.1001219), 2011-12-13
Supplement: pbio.1001219.s003.pdf [file pbio.1001219.s003.pdf]

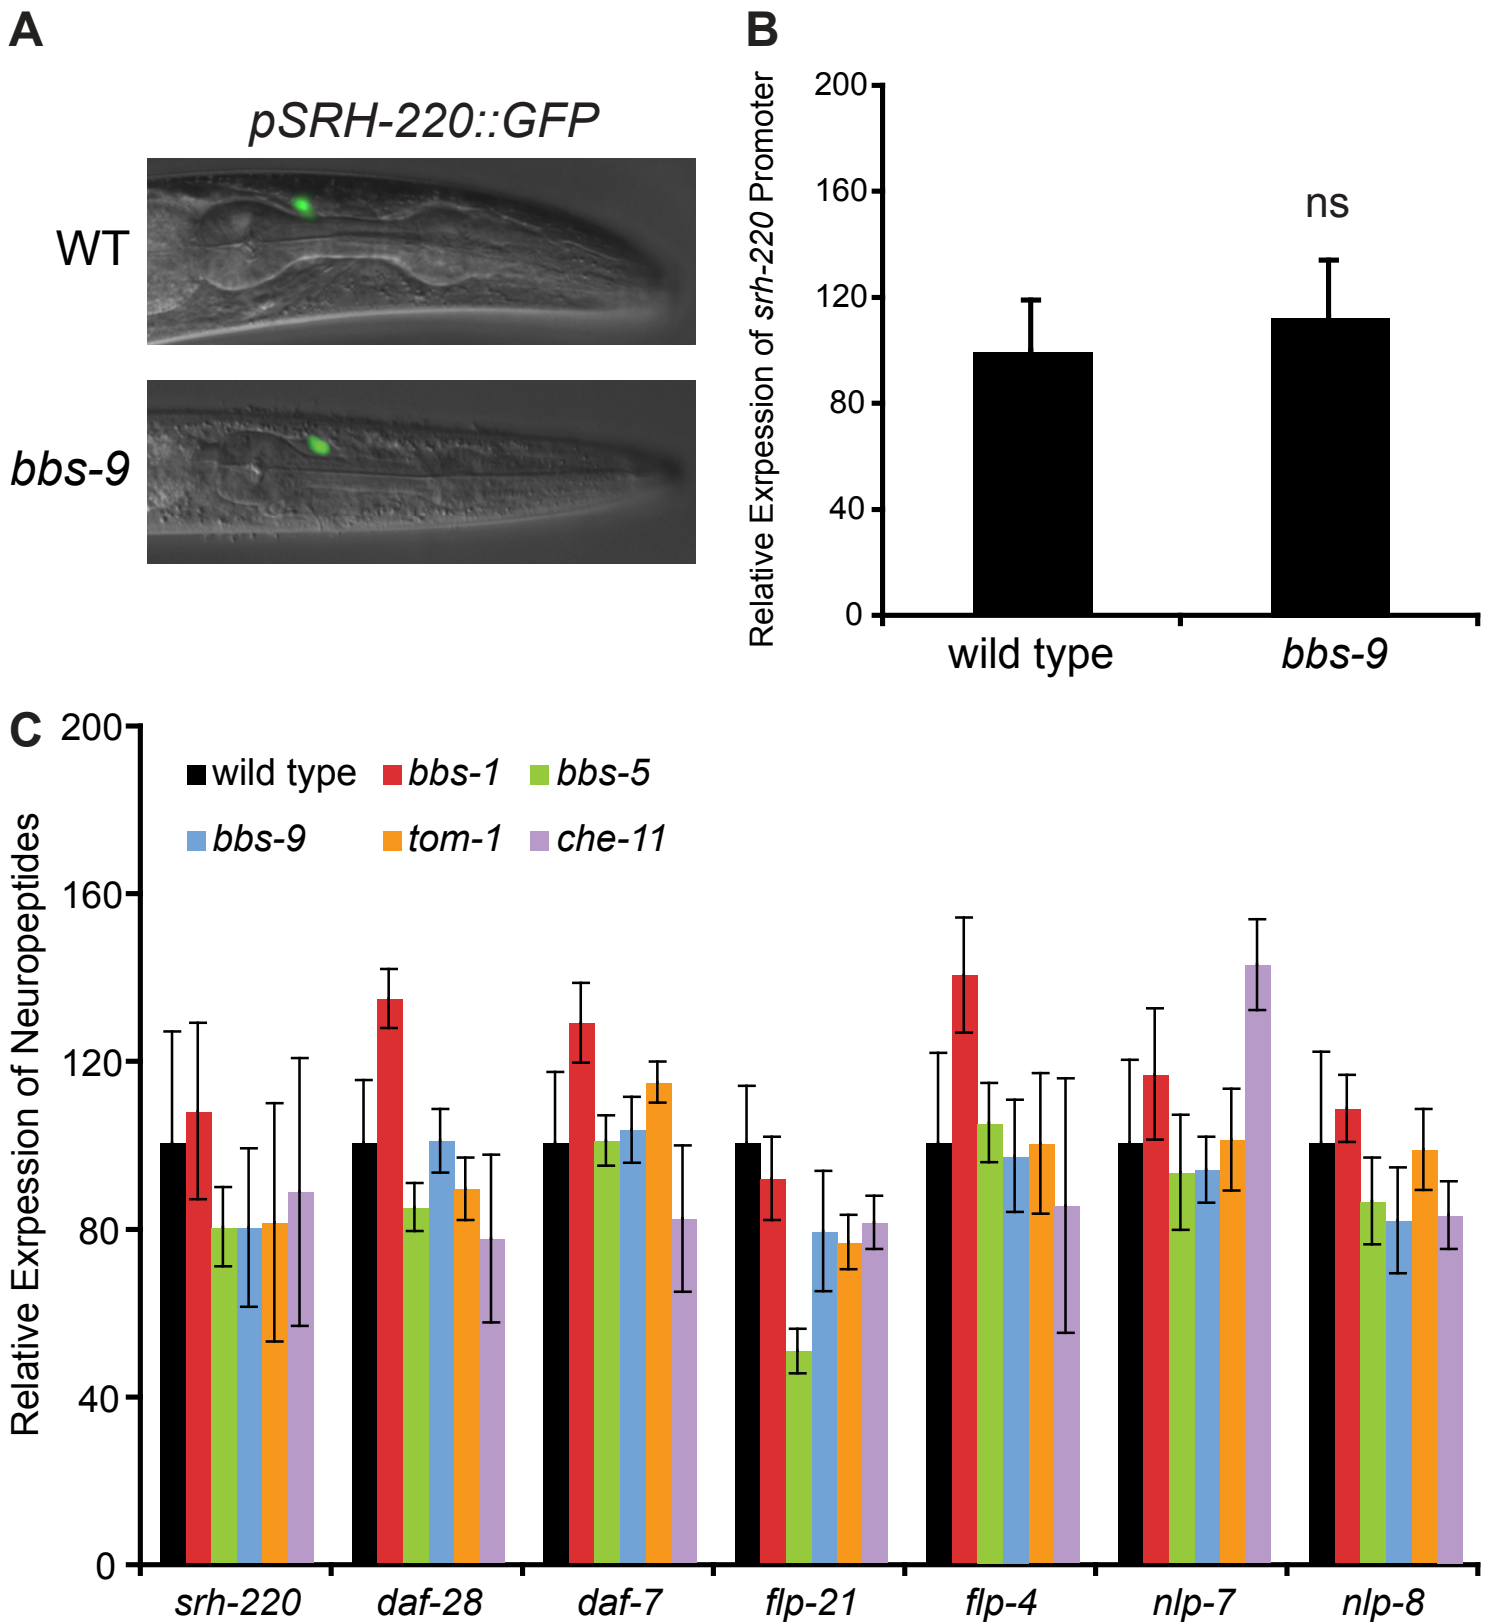

**Supplemental Figure 3. BBSome Mutants have Normal Expression of Neuropeptide Genes**

(A) Representative images of GFP expressed from the ADL specific *srh-220* promoter and (B) corresponding quantitations with standard error are shown. (ns = not significant). (C) Expression of various neuropeptide genes in BBSome, tomosyn and IFT mutants were quantified by RT-PCR. Expression was normalized to actin, *act-1*. Expression in the mutants were not statistically different from wild type except for *flp-21* in *bbs-5* mutant.
