# Supplementary material for: Hyperactive Neuroendocrine Secretion Causes Size, Feeding, and Metabolic Defects of C. elegans Bardet-Biedl Syndrome Mutants
Source: PubMed Central journal article supplement (PMC3236739; doi:10.1371/journal.pbio.1001219), 2011-12-13
Supplement: pbio.1001219.s005.pdf [file pbio.1001219.s005.pdf]

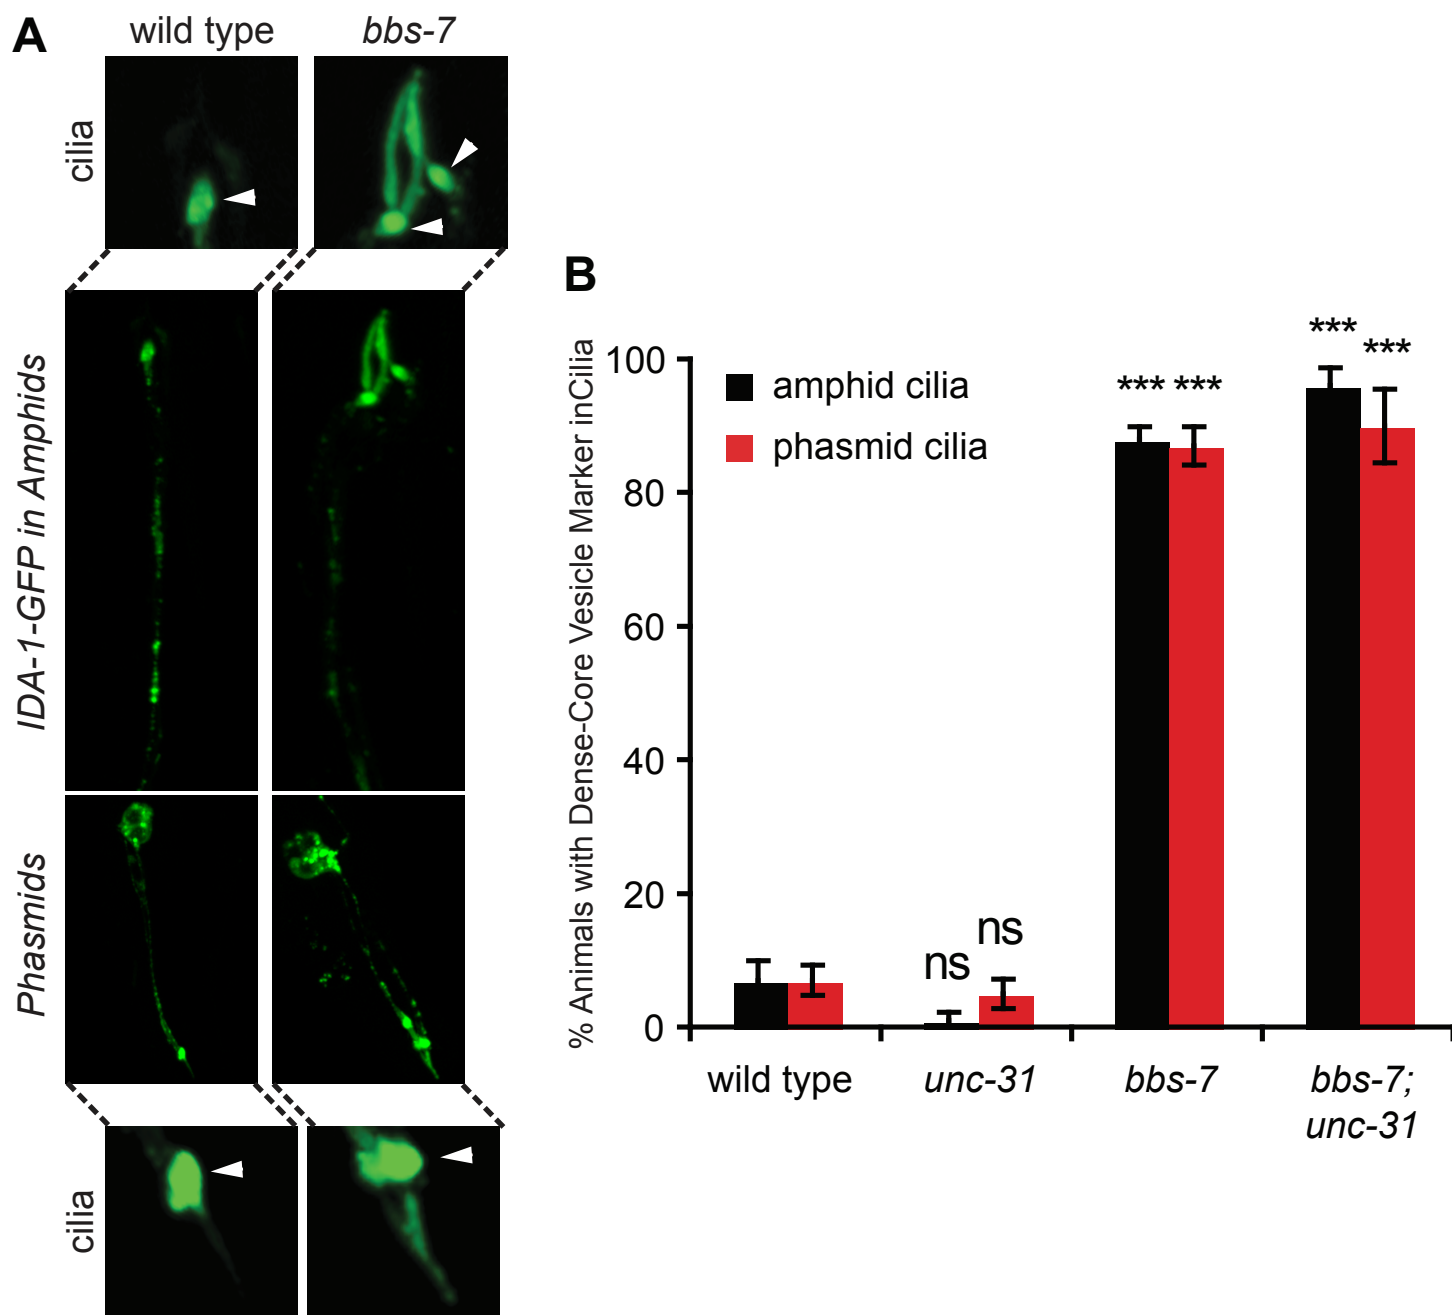

**Supplemental Figure 5. Dense-Core Vesicle Marker, IDA-1, Localized to Cilia in *bbs* Mutants**

Representative images (A) and quantitations with standard error (B) of IDA-1-GFP in amphid and phasmid cilia. Arrowhead indicate dendritic tip at the base of the cilia. (\*\*\*) = p-value < 0.001, ns = not significant compare to wild type).
